# Supplementary material for: Hygiene and biosecurity protocols reduce infection prevalence but do not improve fledging success in an endangered parrot
Source: PubMed Central journal article supplement (PMC6423005; doi:10.1038/s41598-019-41323-w), 2019-03-18
Supplement: 41598_2019_41323_MOESM1_ESM.pdf [file 41598_2019_41323_MOESM1_ESM.pdf]

1 **TITLE: Hygiene and biosecurity protocols reduce infection prevalence but do not improve**  
2 **fledging success in an endangered parrot**

3 Deborah J. Fogell<sup>1,2\*</sup>, Jim J. Groombridge<sup>1</sup>, Simon Tollington<sup>1,3</sup>, Stefano Canessa<sup>4</sup>, Sion  
4 Henshaw<sup>5</sup>, Nicolas Zuel<sup>5</sup>, Carl G. Jones<sup>5,6</sup>, Andrew Greenwood<sup>7</sup> and John G. Ewen<sup>2</sup>

5

6 **Supplementary Table S1** A summary of model averaged coefficients and effect sizes for the  
7 generalised linear mixed effect candidate models analysing a.) the probability of BFDV  
8 infection in 45-day old Mauritius parakeet nestlings over seven breeding seasons (2009/10  
9 to 2015/16), b.) individual BFDV load, c.) probability of fledge success, and d.) body  
10 condition ( $\frac{\text{mass}}{\text{wing length}}$ ) of Mauritius parakeet nestlings over the three experimental  
11 breeding seasons (2013/14 to 2015/16).

| Factor                   | Model Estimate | 95% Confidence Interval |
|--------------------------|----------------|-------------------------|
| <b>a.</b>                |                |                         |
| Treatment                | -0.74          | -1.26 – -0.22           |
| Nearest hopper           | -0.22          | -0.40 – -0.04           |
| Nearest neighbour        | -0.20          | -0.44 – 0.04            |
| Treatment*Nearest hopper | -0.07          | -0.47 – 0.33            |
| <b>b.</b>                |                |                         |
| Treatment                | 0              | -0.01 – 0.01            |
| Nearest hopper           | 0              | -0.01 – 0               |
| Nearest neighbour        | 0              | -0.01 – 0               |
| Treatment*Nearest hopper | 0              | -0.01 – 0               |
| <b>c.</b>                |                |                         |
| Treatment                | 1.3            | -0.04 – 2.63            |
| Nearest hopper           | 0.02           | -0.39 – 0.42            |
| Treatment*Nearest hopper | -0.71          | -1.2 – -0.22            |
| Dam Age                  | 1.12           | -0.48 – 2.73            |
| (Dam Age) <sup>2</sup>   | -1.47          | -3.08 – 0.15            |
| <b>d.</b>                |                |                         |
| Treatment                | -1.95          | -7.79 – 3.89            |
| Nearest hopper           | -2.86          | -6.46 – 0.75            |
| Treatment*Nearest hopper | 4.36           | -1.24 – 9.96            |
| Log(Viral Load)          | 0.18           | -2.59 – 2.95            |
| Dam Age                  | 5.92           | -8.31 – 20.14           |
| (Dam Age) <sup>2</sup>   | -7.64          | -21.75 – 6.46           |

12

13

14 **Supplementary Table S2** A summary of the brood-level prevalence of BFDV in 45-day old Mauritius parakeet nestlings over seven breeding  
 15 seasons (2009/10 to 2015/16) and individual Mauritius parakeet nestling BFDV load over the three experimental breeding seasons (2013/14 to  
 16 2015/16) broken down by subpopulation and treatment.

| Breeding season  | Total nestlings screened | Total nest sites | Mean brood prevalence |           | Nestling viral load (Min – Max)   |                                   |
|------------------|--------------------------|------------------|-----------------------|-----------|-----------------------------------|-----------------------------------|
|                  |                          |                  | Treated               | Untreated | Treated                           | Untreated                         |
| <i>Bel Ombre</i> |                          |                  |                       |           |                                   |                                   |
| 2009/10          | 27                       | 13               | 0.10                  | NA        | NA                                | NA                                |
| 2010/11          | 24                       | 14               | 0.35                  | NA        | NA                                | NA                                |
| 2011/12          | 19                       | 12               | 0.28                  | NA        | NA                                | NA                                |
| 2012/13          | 46                       | 23               | 0.00                  | NA        | NA                                | NA                                |
| 2013/14          | 53                       | 23               | NA                    | 0.45      | NA                                | 1.03E-05<br>(7.05E-08 – 2.22E-04) |
| 2014/15          | 58                       | 28               | 0.03                  | NA        | 2.03E-03<br>(0.00E+00 – 1.19E-01) | NA                                |
| 2015/16          | 73                       | 35               | 0.00                  | 0.00      | 6.48E-09<br>(0.00E+00 – 1.30E-07) | 4.83E-09<br>(0.00E+00 – 1.05E-07) |
| <i>Camp</i>      |                          |                  |                       |           |                                   |                                   |
| 2009/10          | 104                      | 48               | 0.30                  | NA        | NA                                | NA                                |
| 2010/11          | 98                       | 48               | 0.40                  | NA        | NA                                | NA                                |
| 2011/12          | 97                       | 49               | 0.25                  | NA        | NA                                | NA                                |
| 2012/13          | 102                      | 54               | 0.05                  | NA        | NA                                | NA                                |
| 2013/14          | 101                      | 46               | 0.39                  | NA        | 5.84E-02<br>(0.00E+00 – 2.07E+00) | NA                                |
| 2014/15          | 141                      | 63               | NA                    | 0.28      | NA                                | 3.00E-02<br>(0.00E+00 – 3.23E+00) |
| 2015/16          | 131                      | 64               | 0.04                  | 0.08      | 3.49E-03<br>(0.00E+00 – 1.29E-01) | 4.67E-02<br>(0.00E+00 – 2.24E+00) |

17 **Supplementary Table S3** A summary of the body condition ( $^{mass}/_{wing\ length}$ ) and fledge success of Mauritius parakeet nestlings over the three  
18 experimental breeding seasons (2013/14 to 2015/16) broken down by treatment.

| Breeding season | Body condition (Min – Max) |                    | Fledge success |           |
|-----------------|----------------------------|--------------------|----------------|-----------|
|                 | Treated                    | Untreated          | Treated        | Untreated |
| 2013/14         | 1.32 (0.90 – 1.87)         | 1.24 (0.88 – 1.85) | 0.67           | 0.81      |
| 2014/15         | 1.33 (0.92 – 3.14)         | 1.17 (0.86 – 1.83) | 0.92           | 0.83      |
| 2015/16         | 1.38 (0.90 – 3.27)         | 1.31 (0.93 – 2.15) | 0.97           | 0.83      |

19

20
